# Supplementary material for: Arid1a-Plagl1-Hh signaling is indispensable for differentiation-associated cell cycle arrest of tooth root progenitors
Source: PubMed Central journal article supplement — Cell Rep. Author manuscript; Available in PMC 2021 May 19. (PMC8132592; doi:10.1016/j.celrep.2021.108964), 2021-04-06
Supplement: NIHMS1691261-supplement-1.pdf [file NIHMS1691261-supplement-1.pdf]

**Cell Reports, Volume 35**

**Supplemental information**

**Arid1a-Plagl1-Hh signaling is indispensable  
for differentiation-associated cell cycle arrest  
of tooth root progenitors**

**Jiahui Du, Junjun Jing, Yuan Yuan, Jifan Feng, Xia Han, Shuo Chen, Xiang Li, Weiqun Peng, Jian Xu, Thach-Vu Ho, Xinquan Jiang, and Yang Chai**

## SUPPLEMENTARY FIGURE LEGENDS

**Figure S1A. Arid1a is knocked out efficiently in *Gli1-CreER;Arid1a<sup>fl/fl</sup>* mouse molar roots at PN14.5. Related to Fig.2.**

Arid1a immunofluorescence of first mandibular molars of control (Aa-Ac) and *Gli1-CreER;Arid1a<sup>fl/fl</sup>* (Ad-Af) mice at PN14.5. Colored boxes in Aa and Ad are shown enlarged. Arrows in Ab and Ac indicate positive signals in control mice; arrowheads in Ae and Af indicate absence of signal in *Gli1-CreER;Arid1a<sup>fl/fl</sup>* mice.

Schematic at the bottom indicates induction protocol. TAM, tamoxifen. Scale bars: 100  $\mu$ m.

**Figure S1B. Loss of Arid1a in *Gli1*<sup>+</sup> root progenitor cells does not lead to morphological changes at PN7.5. Related to Fig.2.**

Arid1a immunofluorescence of first mandibular molars of control (Ba-Bb) and *Gli1-CreER;Arid1a<sup>fl/fl</sup>* (Be-Bf) mice at PN7.5. Boxes in Ba and Be are enlarged on the right. Arrow in Bb indicates positive signals in control; arrowhead in Bf indicates absence of signal in *Gli1-CreER;Arid1a<sup>fl/fl</sup>*. H&E staining (Bc, Bg) and K14 immunofluorescence (Bd, Bh) of first mandibular molars of control and *Gli1-CreER;Arid1a<sup>fl/fl</sup>* mice at PN7.5.

Schematic at the bottom indicates induction protocol. TAM, tamoxifen. Scale bars: 100  $\mu$ m.

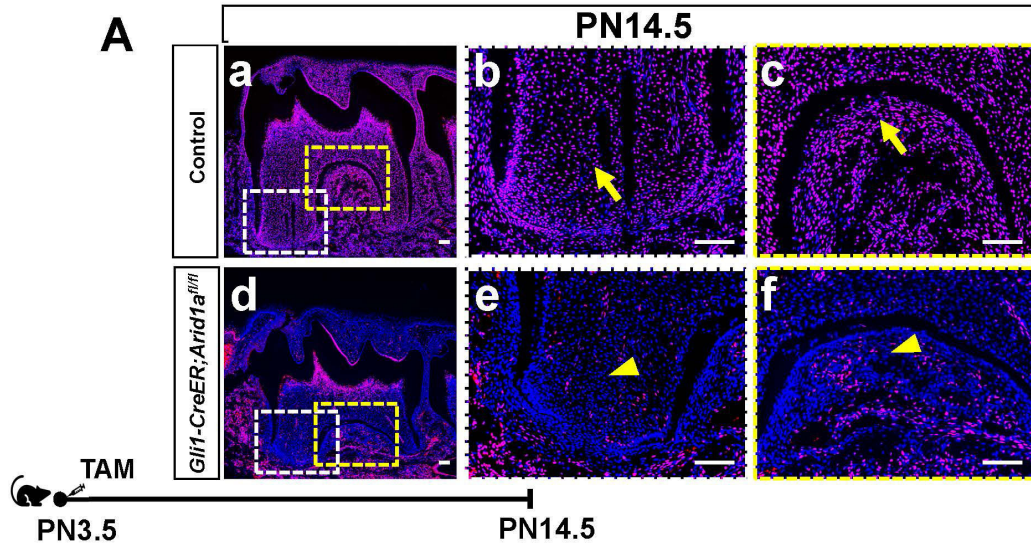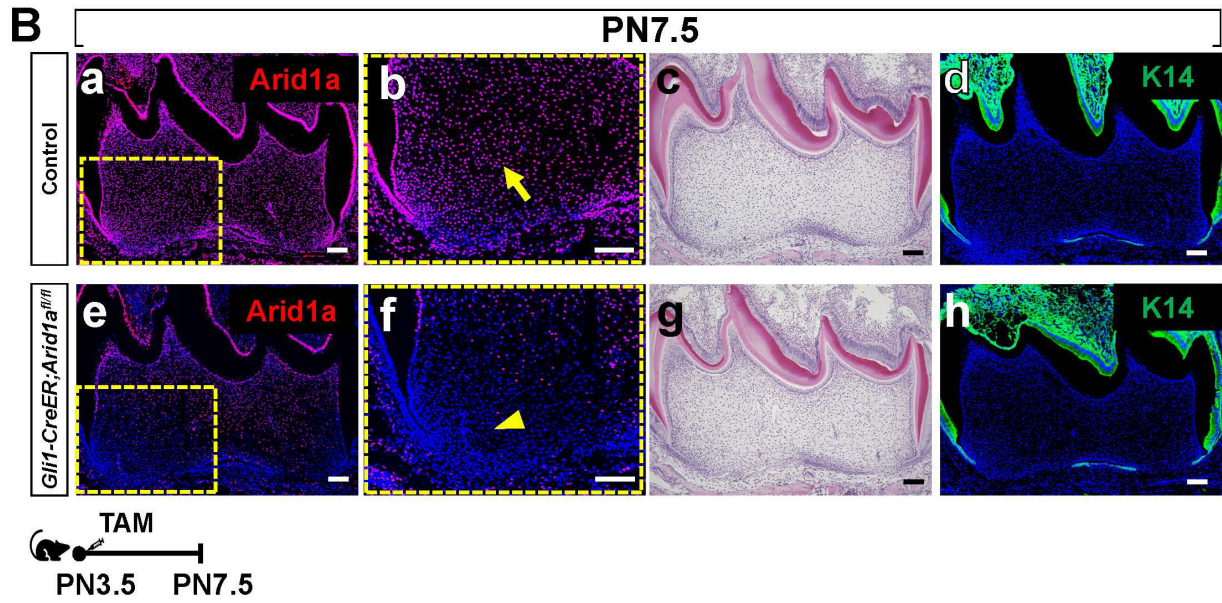

**Figure S2A. Loss of Arid1a in the dental epithelium has no apparent effect on tooth root development. Related to Fig.2.**

(Aa-Ad) Arid1a immunofluorescence of first mandibular molars of control (Aa, Ac) and *K14-rtTA;tetO-Cre;Arid1a<sup>fl/fl</sup>* (Ab, Ad) mice at PN7.5. Boxes in Aa and Ab are shown enlarged. Arrows in Ac indicate positive signals in control mice; arrowheads in Ad indicate absence of signal in *K14-rtTA;tetO-Cre;Arid1a<sup>fl/fl</sup>* mice.

(Ae-Ak) 2D (Ae, Af) and 3D (Ag, Ah) microCT images, H&E staining (Ai, Aj) and quantitative analysis of tooth root length (Ak) of first mandibular molars in control and *K14-rtTA;tetO-Cre;Arid1a<sup>fl/fl</sup>* mice at PN21.5. N=3. NS, no significant difference.

Schematic at the bottom indicates induction protocol. Dox, doxycycline. Data are represented as mean  $\pm$  SD. Scale bars in Aa-Ad: 100  $\mu$ m. Scale bars in Ae-Aj: 200  $\mu$ m.

**Figure S2B. Loss of Arid1a in odontoblasts leads to no apparent tooth root defects at PN21.5. Related to Fig.3.**

MicroCT images (Ba, Bb) and quantitative analysis of tooth root length (Bc) of first mandibular molars in control and *Dmp1-CreER;Arid1a<sup>fl/fl</sup>* mice at PN21.5. N=3. NS, no significant difference.

Data are represented as mean  $\pm$  SD. Scale bars: 300  $\mu$ m.



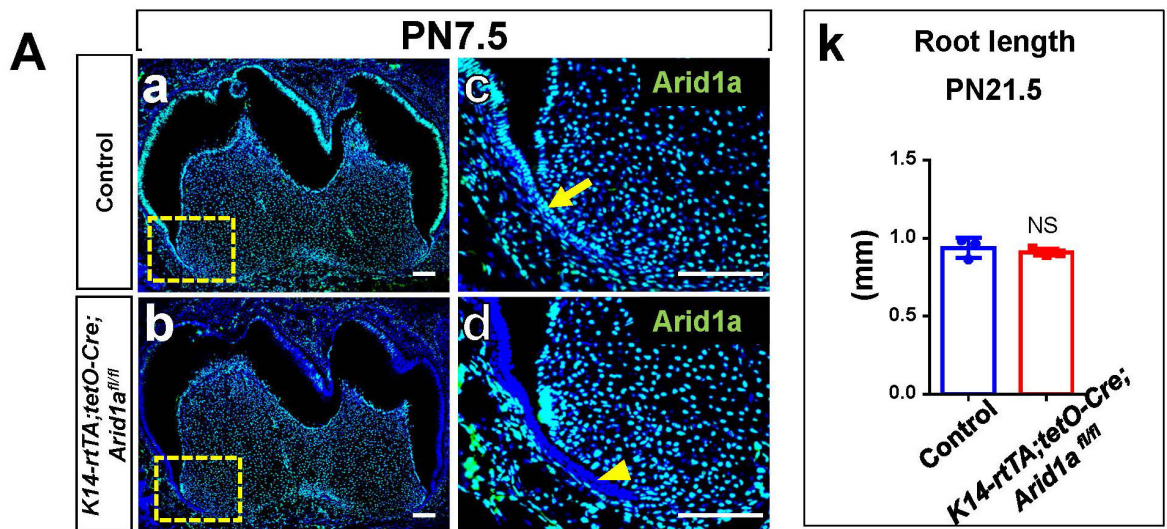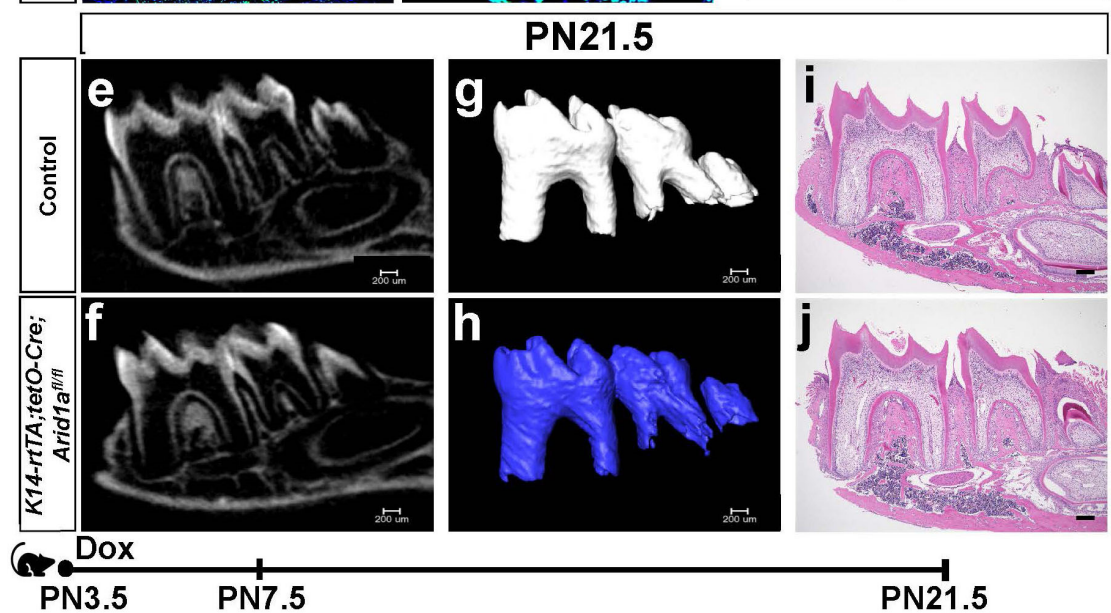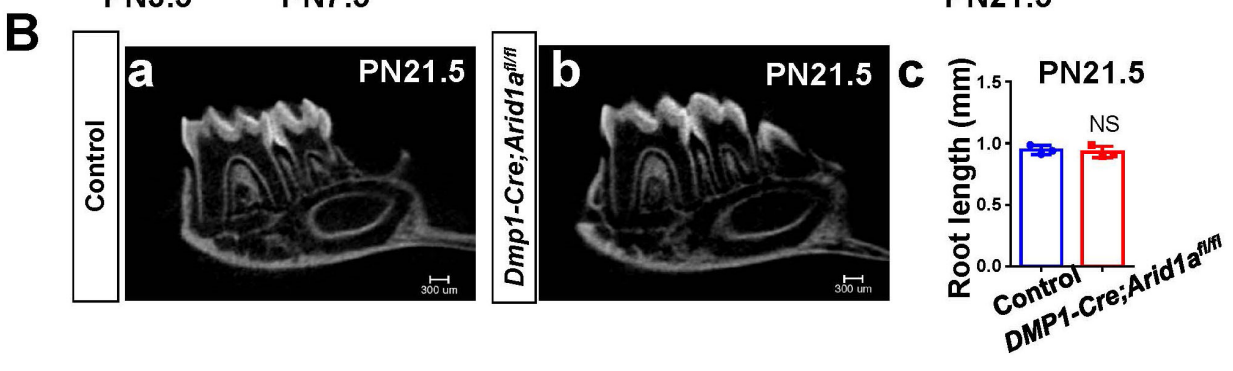

**Figure S3. Loss of Arid1a in Gli1+ root progenitor cells leads to increased apoptosis at a later stage of tooth root development. Related to Fig.3.**

(A-F) Terminal deoxynucleotidyl transferase dUTP nick end labeling (TUNEL) staining (green) and visualization of tdTomato (red) on sagittal sections of first mandibular molars from *Gli1-CreER;tdT* (A-C) and *Gli1-CreER;Arid1a<sup>fl/fl</sup>;tdT* (D-F) mice at PN7.5, PN9.5 and PN11.5 after induction at PN3.5. The boxed areas in A-F are shown enlarged in the middle.

(G) Quantitative analysis of the ratio of TdT+TUNEL+ cells in the root apical region in *Gli1-CreER;tdT* (Con) and *Gli1-CreER;Arid1a<sup>fl/fl</sup>;tdT* (Mut) mouse molars. N=3, \*p<0.05, NS, no significant difference.

Schematic at the bottom indicates induction protocol. TAM, tamoxifen. Data are represented as mean ± SD. Scale bars: A-F, 100 μm.

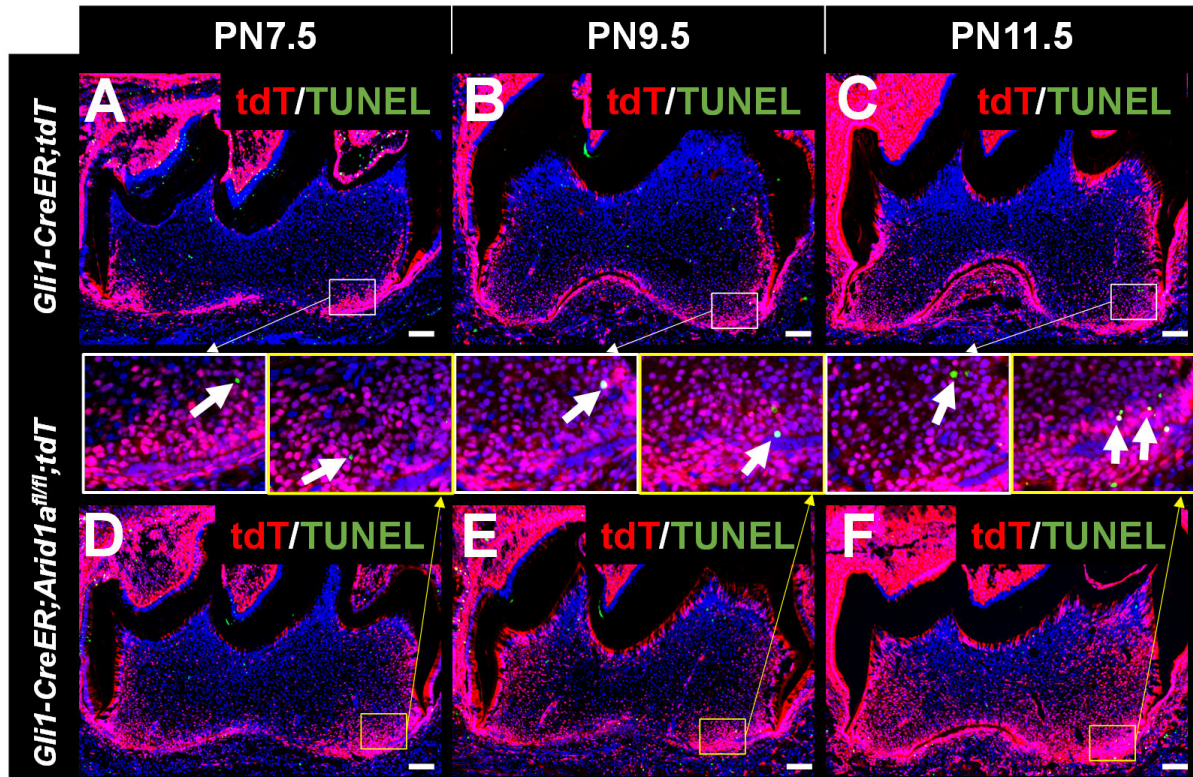

**G**      **TdT+TUNEL+**

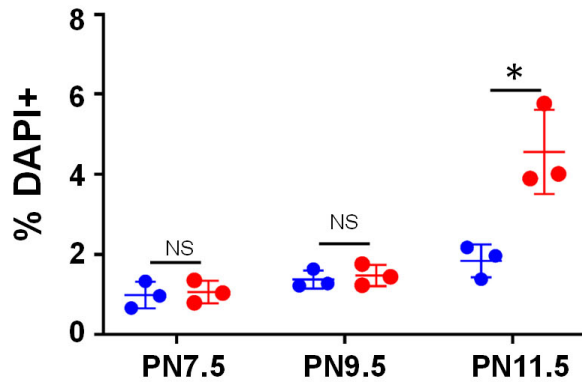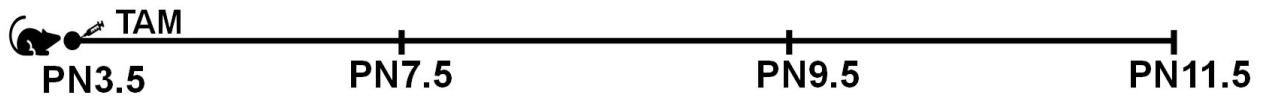

**Figure S4A. PCA analysis and top 20 differentially expressed genes between control and *Gli1-CreER;Arid1a<sup>fl/fl</sup>* mouse molars at PN7.5. Related to Fig.4.**

(Aa) PCA analysis of RNA sequencing data identified two distinct clusters belonging to control and *Gli1-CreER;Arid1a<sup>fl/fl</sup>* mouse molars at PN7.5.

(Ab) Top 20 differentially expressed genes between control and *Gli1-CreER;Arid1a<sup>fl/fl</sup>* mouse molars at PN7.5 sorted from smallest FDR value and fold change  $< -2.0$  or  $> 2.0$ .

Schematic indicates induction protocol. TAM, tamoxifen.

**Figure S4B. Loss of *Arid1a* in *Gli1+* root progenitor cells leads to downregulated Hh signaling activity. Related to Fig.4.**

qPCR of *Gli1* (Ba) and *Ptch1* (Bb) and western blot of *Ccnd1* (Bc) in the apical third of the first mandibular molar in control and *Gli1-CreER;Arid1a<sup>fl/fl</sup>* mice at PN7.5.  $N \geq 3$ ,  $*p < 0.05$ .

Schematic indicates induction protocol. TAM, tamoxifen. Data are represented as mean  $\pm$  SD.

**A**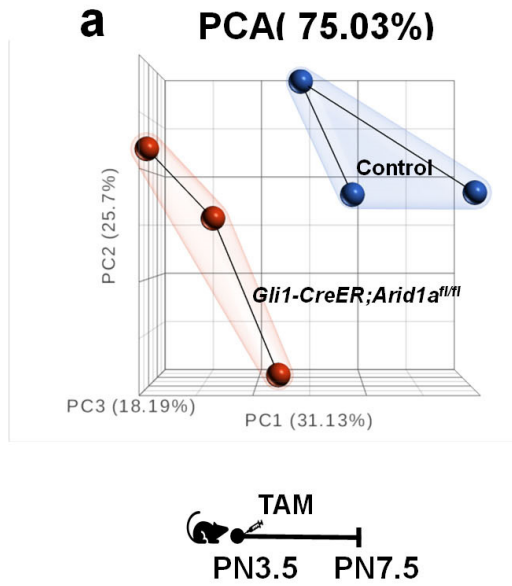**b**

| Gene ID            | FDR step up (MUT vs. WT) | Fold change (MUT vs. WT) |
|--------------------|--------------------------|--------------------------|
| <i>Ctnna2</i>      | 0.010                    | -5.69                    |
| <i>Ppp2r2c</i>     | 0.010                    | -7.07                    |
| <i>Coch</i>        | 0.010                    | 2.79                     |
| <i>Nts</i>         | 0.010                    | 7.09                     |
| <i>Lipm</i>        | 0.010                    | 4.77                     |
| <i>Pstpip1</i>     | 0.010                    | -2.97                    |
| <i>Spock1</i>      | 0.010                    | 2.76                     |
| <i>Ubash3b</i>     | 0.010                    | -2.13                    |
| <i>Ier5l</i>       | 0.010                    | 2.15                     |
| <i>Gm13010</i>     | 0.010                    | -6.16                    |
| <i>Jag2</i>        | 0.010                    | -2.26                    |
| <i>Gm13889</i>     | 0.010                    | -2.15                    |
| <i>Samd11</i>      | 0.010                    | -8.44                    |
| <b><i>Gli1</i></b> | <b>0.010</b>             | <b>-2.34</b>             |
| <i>Dkk2</i>        | 0.010                    | 2.13                     |
| <i>F2r</i>         | 0.010                    | -2.13                    |
| <i>Cas21</i>       | 0.010                    | -2.17                    |
| <i>Lrrtm3</i>      | 0.020                    | 3.83                     |
| <i>Gcat</i>        | 0.020                    | -2.17                    |
| <i>Acpp</i>        | 0.020                    | -3.01                    |

Fold change &lt;-2.0 or &gt; 2.0

**B**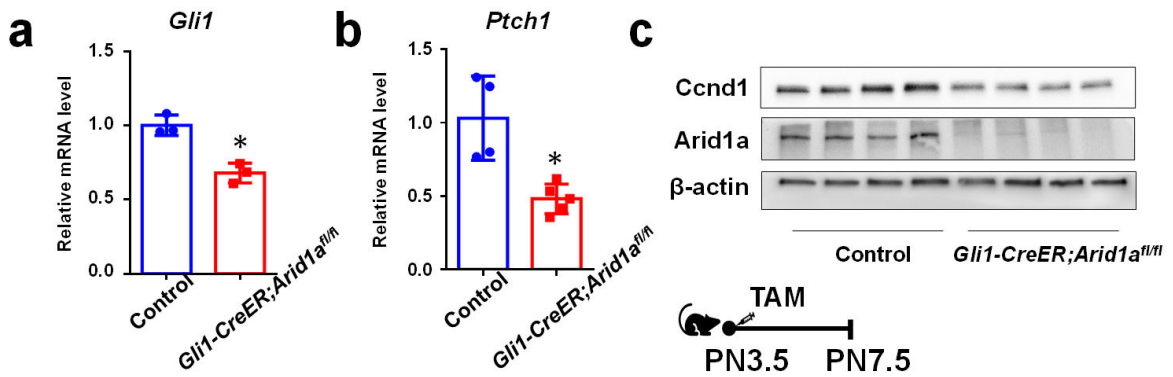

**Figure S5A. Loss of Arid1a in Gli1+ root progenitor cells leads to no apparent change in Wnt signaling activity. Related to Fig.4.**

RNAscope *in situ* hybridization of *Axin2* (Aa-Ad), and *Lef1* (Ae-Ah) on the first mandibular molars from control and *Gli1-CreER;Arid1a<sup>fl/fl</sup>* mice at PN7.5. The boxed areas are shown enlarged on the right. Arrows in Ab, Ad, Af and Ah indicate positive signals.

Schematic at the bottom indicates induction protocol. TAM, tamoxifen. Scale bars: 100  $\mu$ m.

**Figure S5B. Loss of Arid1a leads to downregulated Hh signaling activity, overactivated mitosis and compromised osteogenesis in the mandibular condyle. Related to Fig.4.**

(Ba-Bf) Arid1a immunofluorescence (Ba-Bb), RNAscope *in situ* hybridization of *Gli1* (Bc-Bd), and *Ccnd1* immunofluorescence (Be-Bf) of mandibular condyle from control and *Gli1-CreER;Arid1a<sup>fl/fl</sup>* mice at PN9.5. White dashed lines outline subchondral bone. Arrows in Ba, Bc and Be indicate positive signal. Dotted arrows in Bb, Bd and Bf indicate reduced signal.

(Bg-Bj) Immunofluorescence of pHH3 (green) and visualization of tdTomato (red) on mandibular condyle of control and *Gli1-CreER;Arid1a<sup>fl/fl</sup>;tdT* mice at PN21.5. Boxes in Bg and Bh are enlarged in Bi and Bj. White dashed lines in Bg and Bh outline subchondral bone. Arrows Bi and Bj indicate overlapping signals.

(Bk-Bl) MicroCT images of condyles from control and *Gli1-CreER;Arid1a<sup>fl/fl</sup>* mice at PN21.5. White and red dashed lines outline condyle in control and *Gli1-CreER;Arid1a<sup>fl/fl</sup>* mice. White and red solid lines represented the condyle width in control and *Gli1-CreER;Arid1a<sup>fl/fl</sup>* mice.

Schematic at the right indicates induction protocol. TAM, tamoxifen. Scale bars in Ba-Bj: 100  $\mu$ m.

Scale bars in Bk-Bl: 300  $\mu$ m.



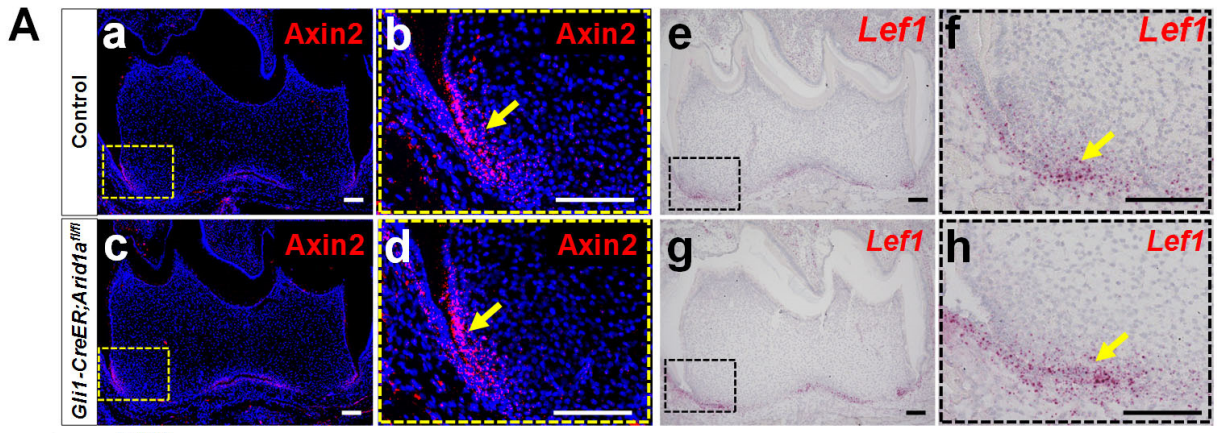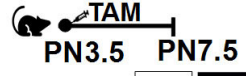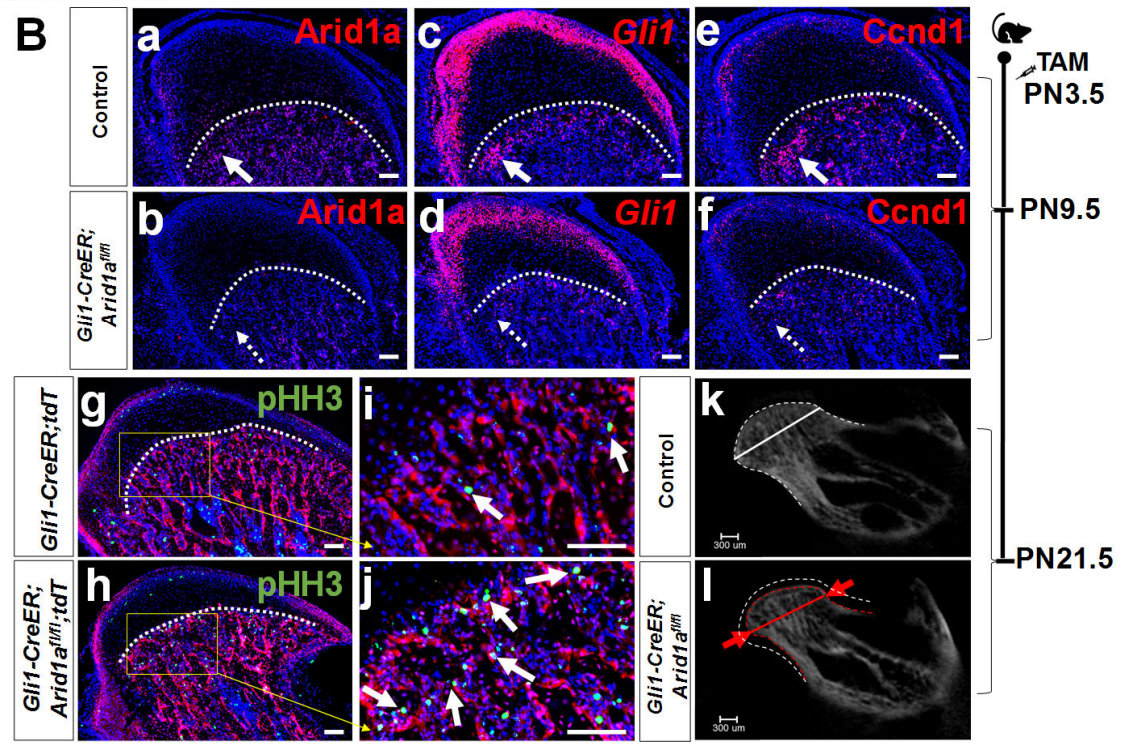



**Figure S6. Upregulation of Hh signaling partially rescues the cell mitosis defects in *Gli1-CreER;Arid1a<sup>fl/fl</sup>* mouse molars. Related to Fig.5.**

RNAscope *in situ* hybridization of *Gli1* (red) and *Ptch1* (red) and immunofluorescence of *Ccnd1* (red) and pHH3 (green) of sagittal sections of first mandibular molars of control (A-D), *Gli1-CreER;Arid1a<sup>fl/fl</sup>* (E-H), and *Gli1-CreER;Arid1a<sup>fl/fl</sup>;SmoM2<sup>fl/+</sup>* (I-L) mice at PN7.5 after induction at PN3.5. Arrows indicate positive signals; arrowheads in E, F and G indicate reduced signal in targeted region.

(M) Quantification of pHH3+ cells in the apical third of first mandibular molars from control, *Gli1-CreER;Arid1a<sup>fl/fl</sup>* and *Gli1-CreER;Arid1a<sup>fl/fl</sup>;SmoM2<sup>fl/+</sup>* mice at PN7.5 after induction at PN3.5 (the boxed areas in D, H and L). N=3, \*p<0.05.

Schematic indicates induction protocol. TAM, tamoxifen. Data are represented as mean  $\pm$  SD.

Scale bars: 100  $\mu$ m.

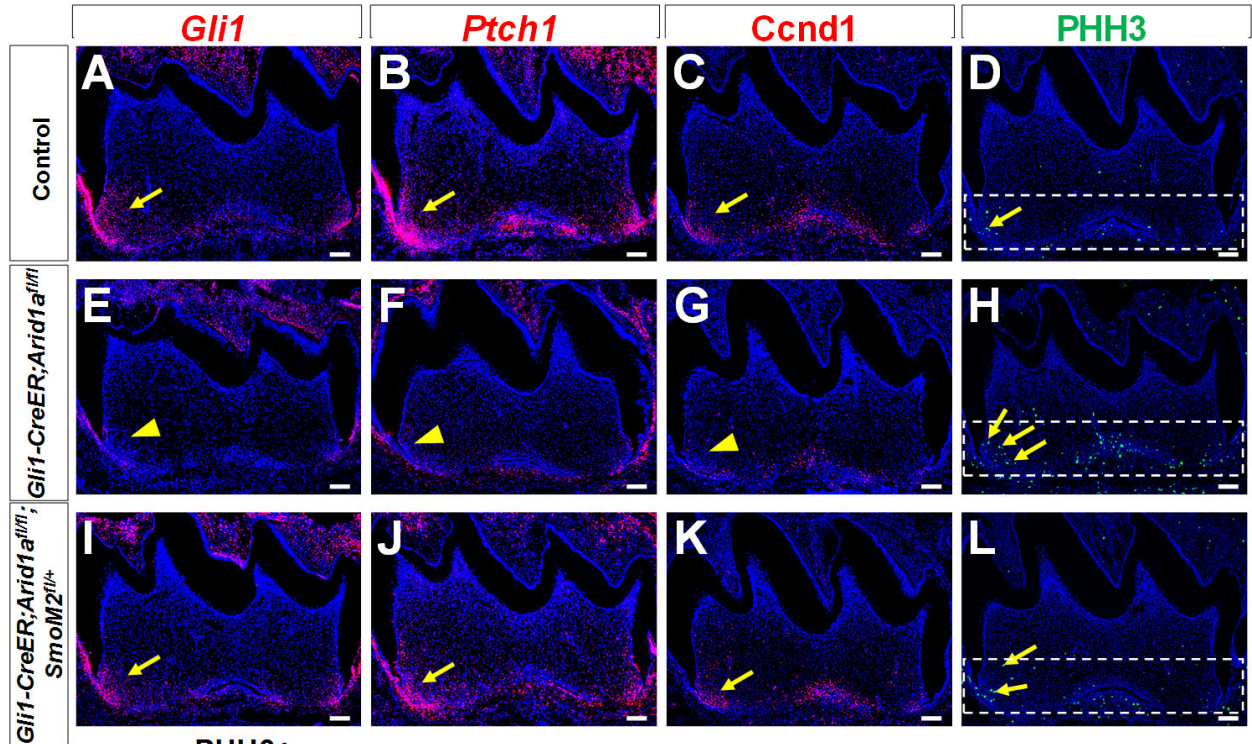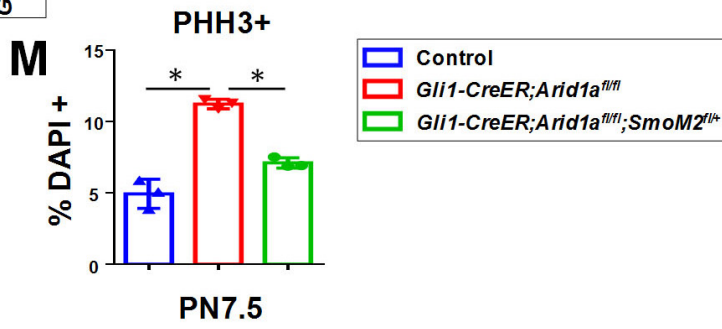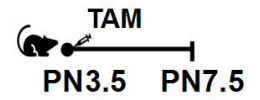

**Figure S7A. Motif analysis result of ATAC-sequencing. Related to Fig.6.**

Top thirteen motifs enriched in regions with increased accessibility in control group compared to *Gli1-CreER;Arid1a<sup>fl/fl</sup>* mice at PN7.5 after induction at PN3.5.

Schematic at the right indicates induction protocol. TAM, tamoxifen.

**Figure S7B. The mRNA and protein expression levels of *Plagl1* after loss of *Arid1a* in *Gli1+* root progenitor cells. Related to Fig.6.**

(Ba-Bd) RNAscope *in situ* hybridization (red) of *Plagl1* on sagittal sections of first mandibular molars of control (Ba-Bb) and *Gli1-CreER;Arid1a<sup>fl/fl</sup>* mice (Bc-Bd) at PN7.5. Boxed areas in Ba and Bc are enlarged on the right. Arrows in Bb and Bd indicate positive signals.

(Be) Western blot of *Plagl1* in the apical third of the first mandibular molars of control and *Gli1-CreER;Arid1a<sup>fl/fl</sup>* mice at PN7.5.

Schematic at the bottom indicates induction protocol. TAM, tamoxifen. Scale bars: 100  $\mu$ m.

**Figure S7C. Colocalization of *plagl1* and proliferating cells at the apical part of tooth root at PN7.5. Related to Fig.6.**

RNAscope *in situ* hybridization of *Plagl1* (green) and immunofluorescence of Ki67 (red) of sagittal sections of first mandibular molars of control mice at PN7.5. Boxed area in Ca is enlarged in Cb-Cd. Arrows in Cb-Cd indicate positive signals.

Scale bars: 100  $\mu$ m.

**A**

Total target sequences = 461  
 Total background sequences = 41286  
 \* - possible false positive

### WT-Specific using summit

| Rank | Motif                | P-value | log P-value | % of Targets | % of Background | STD(Bg STD)     | Best Match Details                                                                                                                 |
|------|----------------------|---------|-------------|--------------|-----------------|-----------------|------------------------------------------------------------------------------------------------------------------------------------|
| 1    | <b>TGAGTGAITTC</b>   | 1e-41   | -9.610e+01  | 3.25%        | 0.00%           | 46.0bp (20.1bp) | Gfi1/MA0038.1/Jaspar(0.698)<br><a href="#">More Information</a>   <a href="#">Similar Motifs Found</a>                             |
| 2    | <b>GCAGGGGGATGA</b>  | 1e-39   | -9.181e+01  | 4.12%        | 0.02%           | 47.5bp (77.4bp) | PB0124.1_Gabpa.2/Jaspar(0.668)<br><a href="#">More Information</a>   <a href="#">Similar Motifs Found</a>                          |
| 3    | <b>CACATCCTCTGC</b>  | 1e-21   | -5.062e+01  | 3.25%        | 0.05%           | 51.1bp (46.1bp) | PU.1(ETS)/ThioMac-PU.1-ChIP-Seq(GSE21512)/Homer(0.739)<br><a href="#">More Information</a>   <a href="#">Similar Motifs Found</a>  |
| 4    | <b>AATATGGCGA</b>    | 1e-20   | -4.692e+01  | 1.74%        | 0.00%           | 45.7bp (13.7bp) | YY1/MA0095.2/Jaspar(0.735)<br><a href="#">More Information</a>   <a href="#">Similar Motifs Found</a>                              |
| 5    | <b>TGTGTCAAGGCC</b>  | 1e-20   | -4.692e+01  | 1.74%        | 0.00%           | 58.1bp (0.0bp)  | MEIS1/MA0498.2/Jaspar(0.621)<br><a href="#">More Information</a>   <a href="#">Similar Motifs Found</a>                            |
| 6    | <b>TGTCTATGCTGT</b>  | 1e-17   | -4.104e+01  | 3.04%        | 0.07%           | 54.9bp (80.8bp) | POL009.1_DCE_S_II/Jaspar(0.604)<br><a href="#">More Information</a>   <a href="#">Similar Motifs Found</a>                         |
| 7    | <b>ATTACACACT</b>    | 1e-17   | -3.944e+01  | 4.56%        | 0.31%           | 63.0bp (66.1bp) | FOXH1/MA0479.1/Jaspar(0.665)<br><a href="#">More Information</a>   <a href="#">Similar Motifs Found</a>                            |
| 8*   | <b>GTGCTGTCTGTG</b>  | 1e-11   | -2.551e+01  | 1.30%        | 0.01%           | 51.9bp (54.5bp) | Smad2(MAD)/ES-SMAD2-ChIP-Seq(GSE29422)/Homer(0.647)<br><a href="#">More Information</a>   <a href="#">Similar Motifs Found</a>     |
| 9*   | <b>GAGAGCCA</b>      | 1e-6    | -1.424e+01  | 10.85%       | 5.12%           | 54.4bp (62.1bp) | Zac1(Zf)/Neuro2A-Plag1-ChIP-Seq(GSE75942)/Homer(0.687)<br><a href="#">More Information</a>   <a href="#">Similar Motifs Found</a>  |
| 10*  | <b>CICTCTGCCT</b>    | 1e-5    | -1.166e+01  | 3.25%        | 0.82%           | 56.9bp (63.2bp) | ZNF768(Zf)/Raji-ZNF768-ChIP-Seq(GSE111879)/Homer(0.706)<br><a href="#">More Information</a>   <a href="#">Similar Motifs Found</a> |
| 11*  | <b>TAGGTTAGGTT</b>   | 1e-4    | -9.764e+00  | 0.43%        | 0.00%           | 57.7bp (35.1bp) | PSE(SNAPc)/K562-nStart-Seq/Homer(0.642)<br><a href="#">More Information</a>   <a href="#">Similar Motifs Found</a>                 |
| 12*  | <b>GFACTGCACCTGC</b> | 1e-4    | -9.501e+00  | 0.87%        | 0.05%           | 55.1bp (90.9bp) | PB0091.1_Zbtb3.1/Jaspar(0.797)<br><a href="#">More Information</a>   <a href="#">Similar Motifs Found</a>                          |
| 13*  | <b>ACAGCTCACACT</b>  | 1e-3    | -8.384e+00  | 0.43%        | 0.01%           | 56.0bp (0.0bp)  | PB0130.1_Gm397.2/Jaspar(0.685)<br><a href="#">More Information</a>   <a href="#">Similar Motifs Found</a>                          |

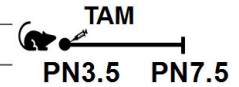**B**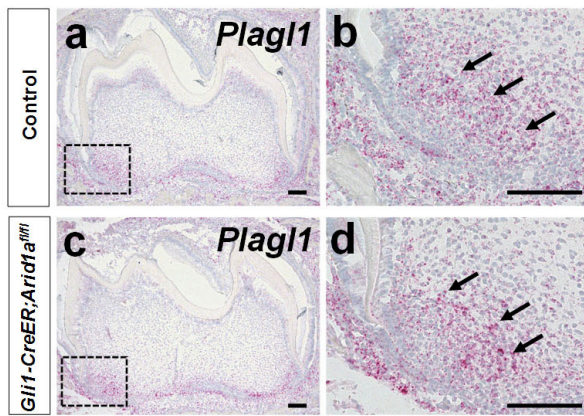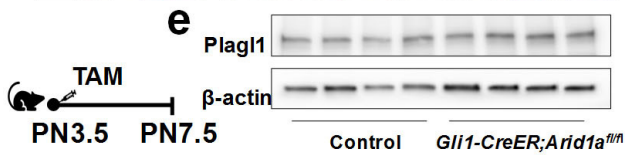**C**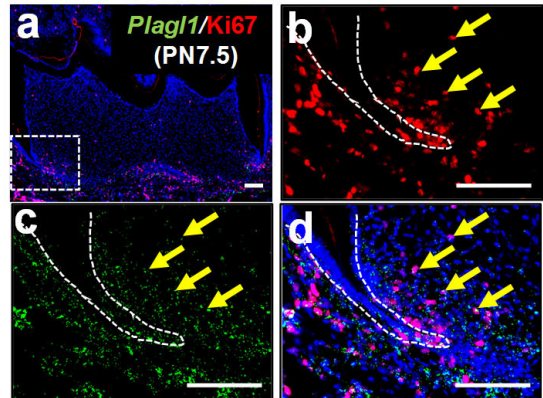

**Table S1. Antibody sources and concentrations. Related to STAR Methods.**

| Primary antibodies    | Source                   | Dilutions      |
|-----------------------|--------------------------|----------------|
| <b>Immunostaining</b> |                          |                |
| Arid1a                | Abcam, ab182561          | 1:100          |
| Ki67                  | Abcam, ab15580           | 1:100          |
| $\beta$ -gal          | Abcam, ab9361            | 1:100          |
| K14                   | Abcam, ab181595          | 1:100          |
| PHH3                  | Millipore, 06-570        | 1:100          |
| Ccnd1                 | Abcam, ab16663           | 1:100          |
| Periostin             | Abcam, ab14041           | 1:100          |
| Arid1b                | Abcam, ab244351          | 1:100          |
| <b>Western Blot</b>   |                          |                |
| Arid1a                | Santa Cruz, sc-32761     | 1:100          |
| Arid1b                | Abcam, ab244351          | 1:1000         |
| Plagl1                | Santa Cruz, sc-166944    | 1:100          |
| Gli1                  | Novus, NBP1-78259        | 1:1000         |
| Dspp                  | Santa Cruz, sc-73632 HRP | 1:200          |
| DMP-1                 | R&D, AF4386-SP           | 0.1 $\mu$ g/mL |
| Ccnd1                 | Santa Cruz, sc-8396 HRP  | 1:200          |
| Beta Actin            | Abcam, ab20272           | 1:1000         |

**Table S2. List of PCR primers. Related to STAR Methods.**

| Gene name            | Forward sequence        | Reverse sequence        | Application |
|----------------------|-------------------------|-------------------------|-------------|
| <i>Beta-actin</i>    | GGCTGTATCCCCTCCATCG     | CCAGTTGGTAACAATGCCATGT  | qRT-PCR     |
| <i>Gli1</i>          | CCAAGCCAACCTTTATGTCAGGG | AGCCCGCTTCTTTGTTAATTTGA | qRT-PCR     |
| <i>Ptch1</i>         | AAAGAAGTGCAGCAAGTTTTTG  | CTTCTCCTATCTTCTGACGGGT  | qRT-PCR     |
| <i>Plagl1</i>        | ATGGCTCCATTCCGCTGTC     | CTCAGCCTTCGAGCACTTGAA   | qRT-PCR     |
| <i>Gli1 (site 1)</i> | CGTCTCCCCGACTTTTGAGT    | CCTTCCCGATTTCCCCAAA     | ChIP-qPCR   |
| <i>Gli1 (site 2)</i> | ACTGAGCTTTCCCATGTCTG    | ATGTTCCATAGGTTCGCACCC   | ChIP-qPCR   |
